# Supplementary material for: MultiPro: DDA-PASEF and diaPASEF acquired cell line proteomic datasets with deliberate batch effects
Source: Springer Nature journal article supplement (doi:10.1038/s41597-023-02779-8), 2023-12-02
Supplement: MOESM1 [file 41597_2023_2779_MOESM1_ESM.pdf]

# Table of contents

Supplementary Fig. 1: Protein coverage distribution. ....2

Supplementary Fig. 2: Coefficients of variation across technical replicates. ....4

Supplementary Fig. 3: Peptide variability measured by coefficients of variation across all samples. ....5

Supplementary Fig. 4: Relationship between missing proportion and abundance of protein (DDA) or protein group (DIA) measured by Spearman correlation coefficients.....6

Supplementary Fig. 5: Relationship between missing proportion and abundance of peptide (DDA) or precursor (DIA) measured by Spearman correlation coefficients.....7

Supplementary Fig. 6: Relationship between missing proportion and score of peptide (DDA) or precursor (DIA) measured by Spearman correlation coefficients.....8

Supplementary Fig. 7: Relationship between missing proportion and score of protein (DDA) or protein group (DIA) measured by Spearman correlation coefficients. ....9

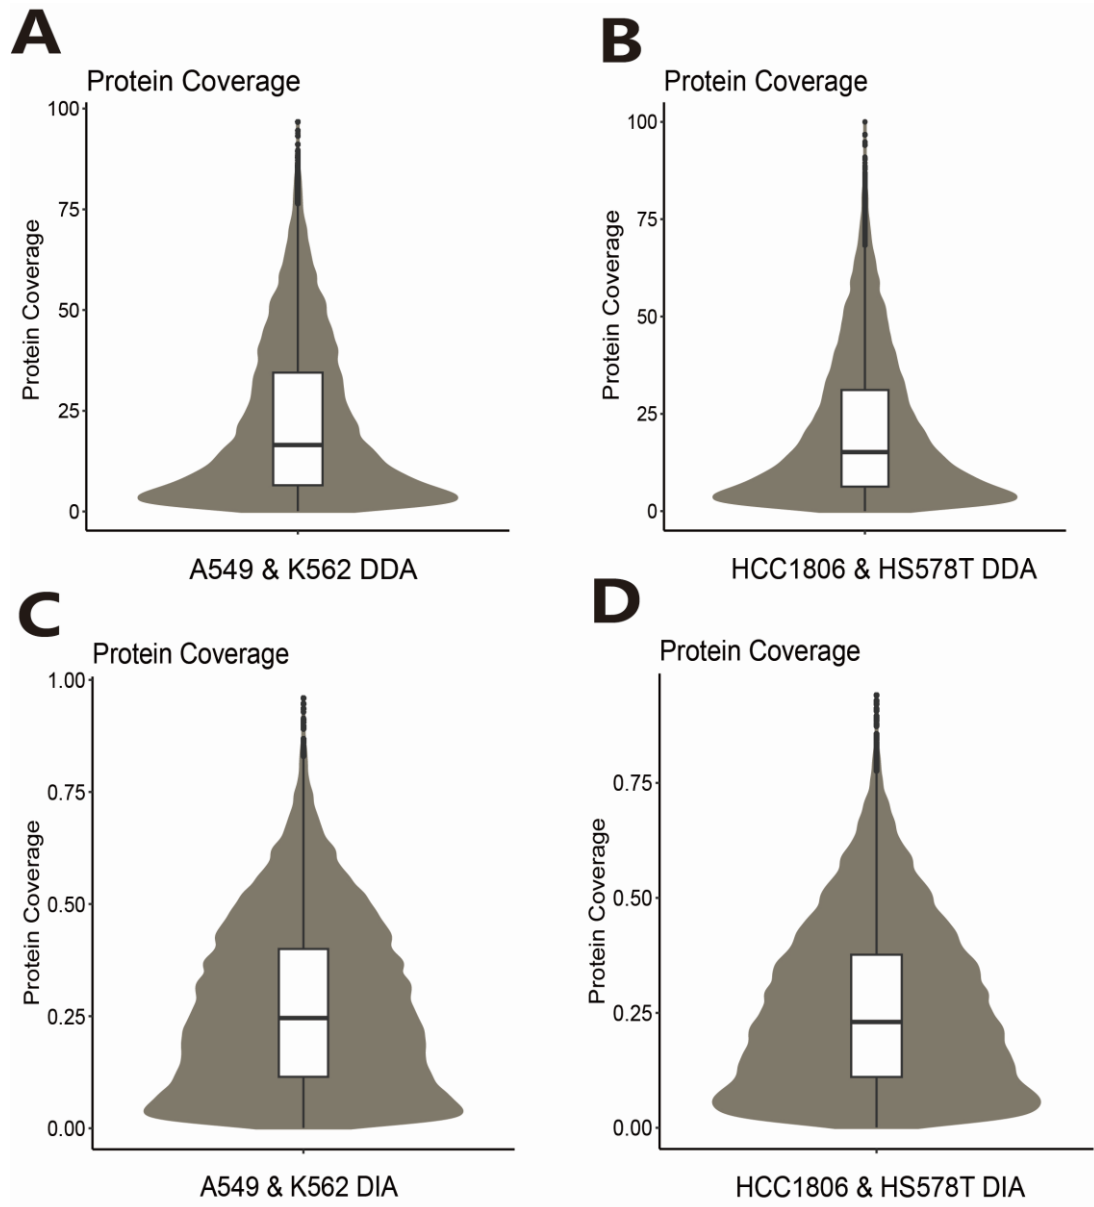

Supplementary Fig. 1: Protein coverage distribution of (A) A549 & K562 DDA dataset; (B) HCC1806 & HS578T DDA dataset; (C) A549 & K562 DIA dataset; (D) HCC1806 & HS578T DIA dataset.

**A**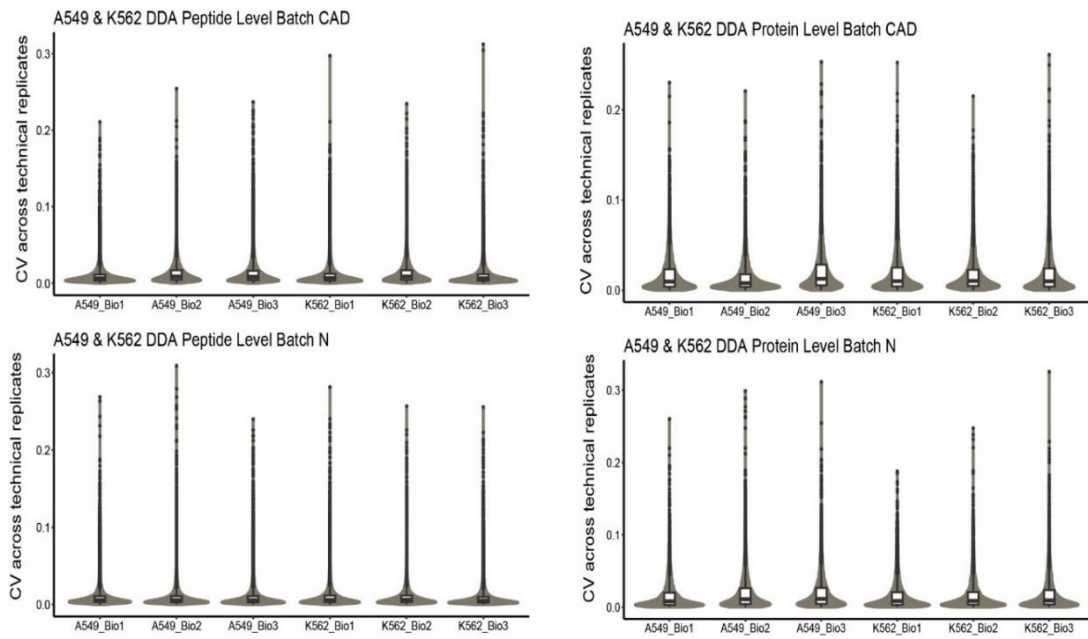**B**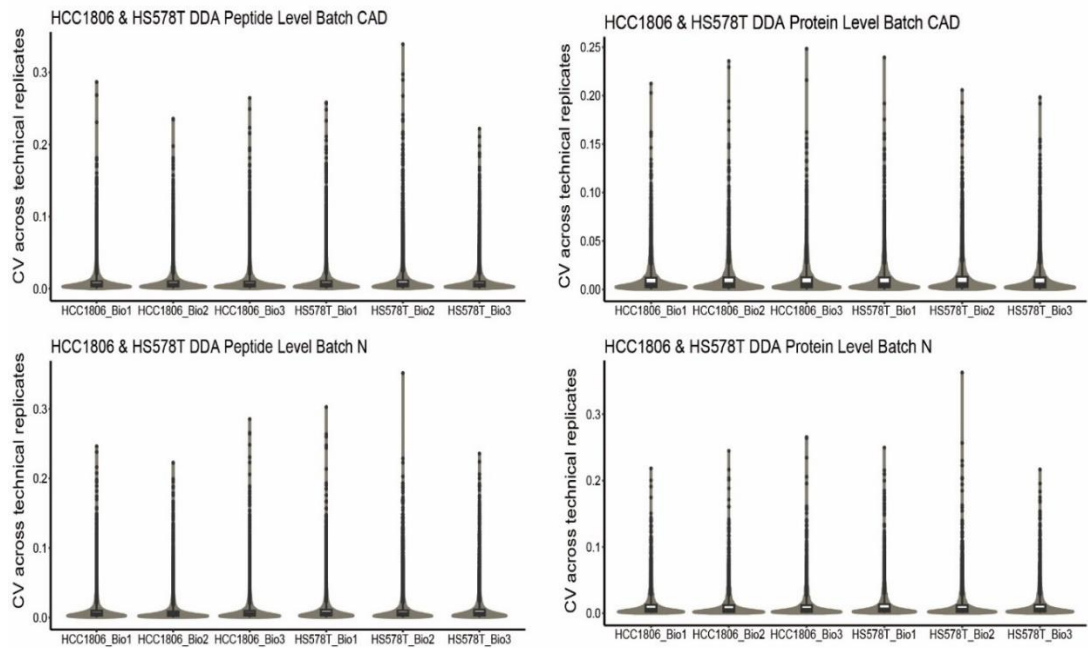

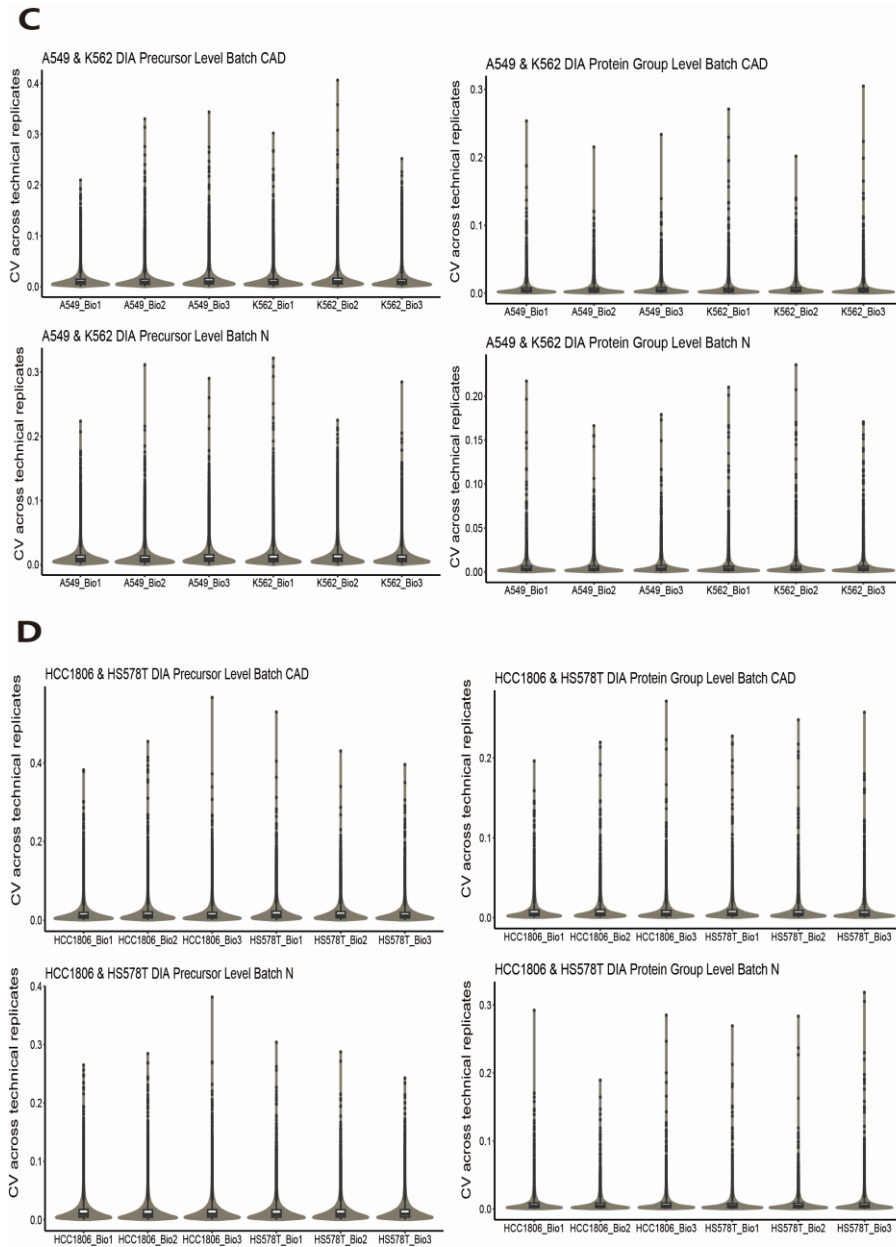

Supplementary Fig. 2: Coefficients of variation across technical replicates from (A) A549 & K562 DDA dataset; (B) HCC1806 & HS578T DDA dataset; (C) A549 & K562 DIA dataset; (D) HCC1806 & HS578T DIA dataset at 1) peptide and protein level (DDA); 2) precursor and protein group level (DIA).

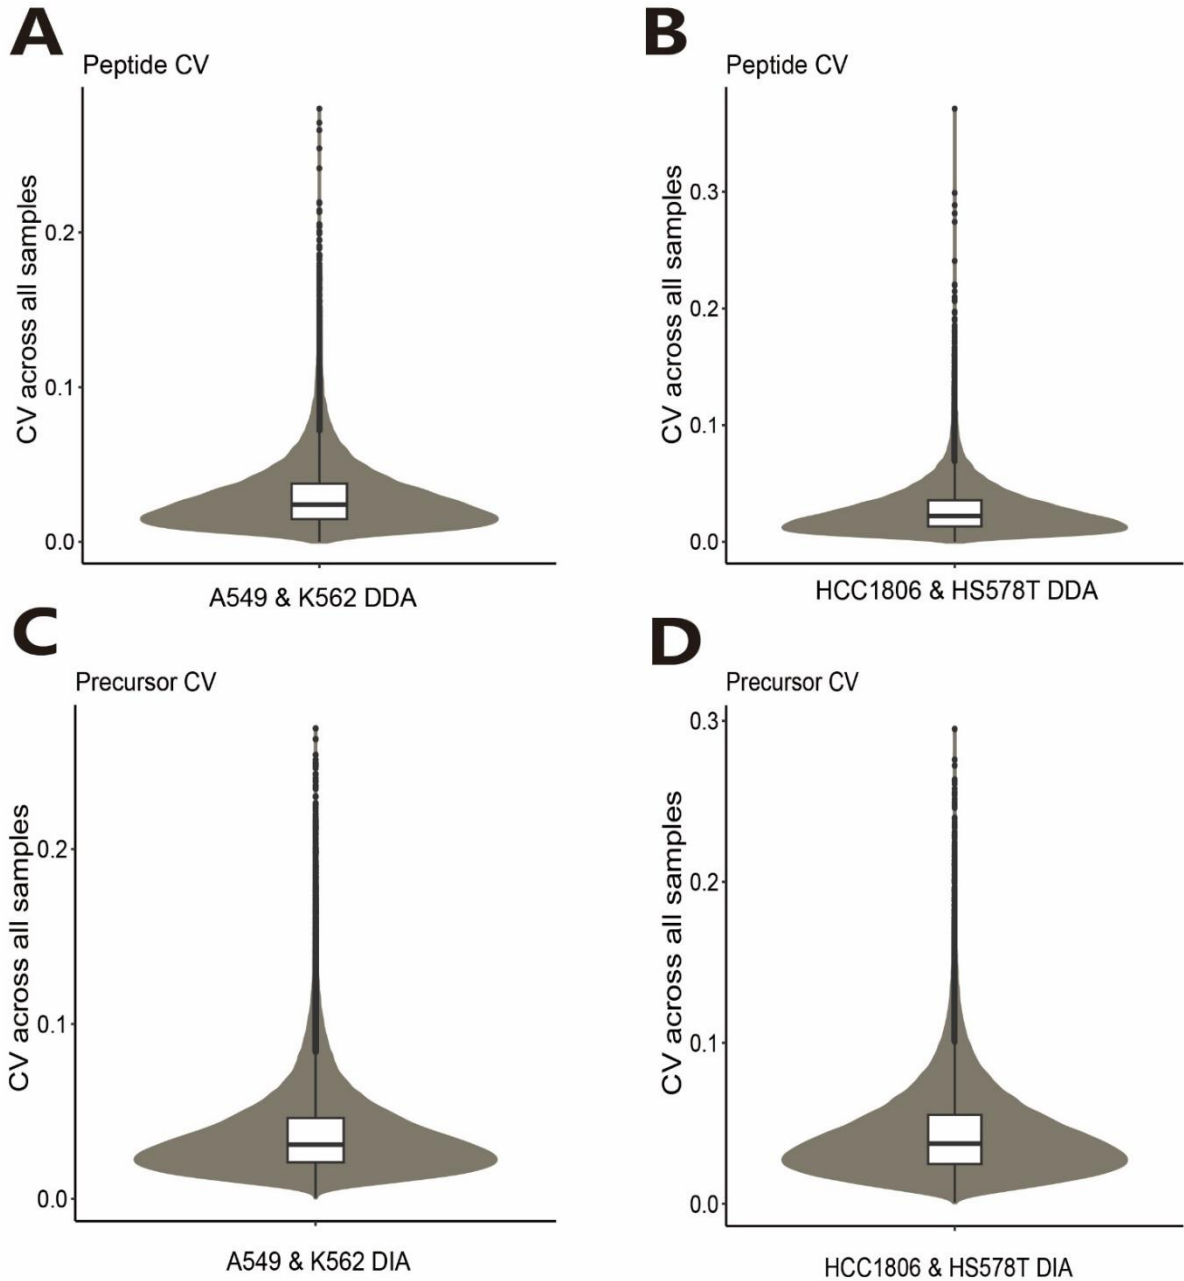

Supplementary Fig. 3: Peptide variability of (A) A549 & K562 DDA dataset; (B) HCC1806 & HS578T DDA dataset; (C) A549 & K562 DIA dataset; (D) HCC1806 & HS578T DIA dataset measured by coefficients of variation across all samples.

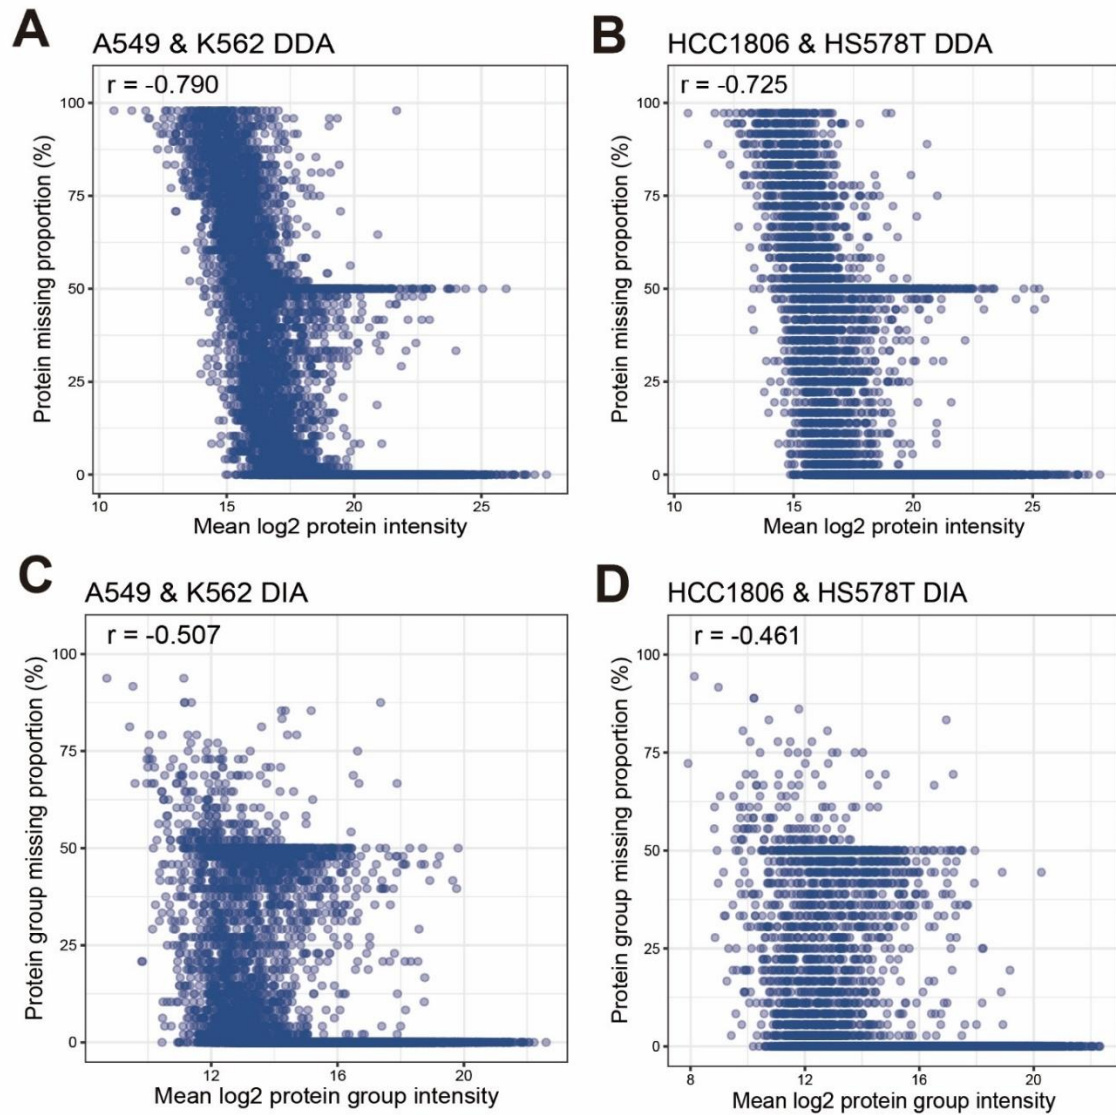

Supplementary Fig. 4: Relationship between missing proportion and abundance of protein (DDA) or protein group (DIA) from (A) A549 & K562 DDA dataset; (B) HCC1806 & HS578T DDA dataset; (C) A549 & K562 DIA dataset; (D) HCC1806 & HS578T DIA dataset measured by Spearman correlation coefficients.

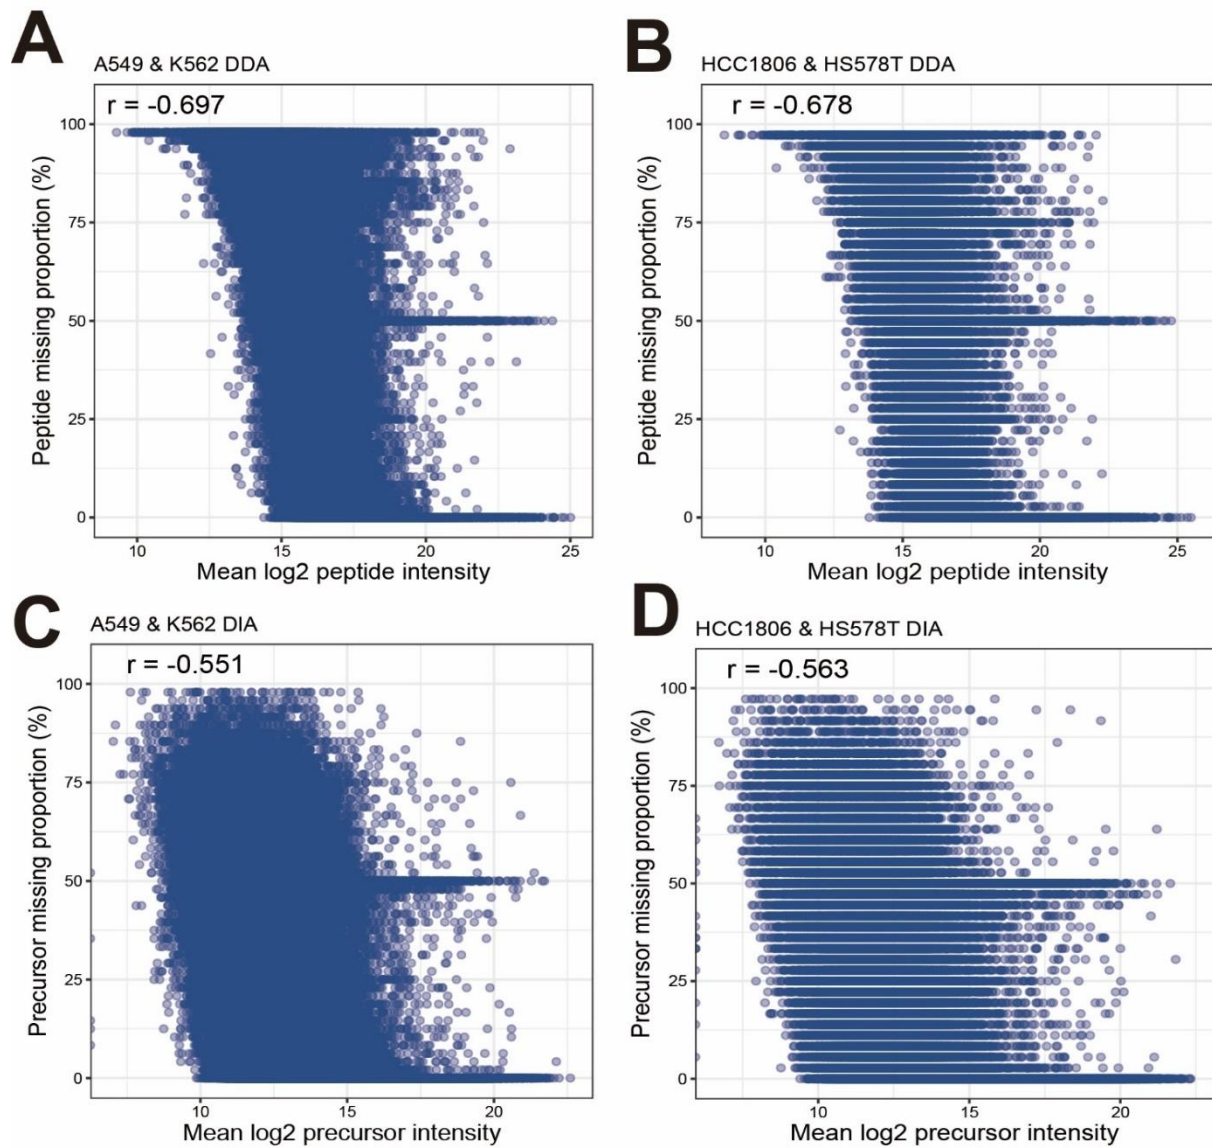

Supplementary Fig. 5: Relationship between missing proportion and abundance of peptide (DDA) or precursor (DIA) from (A) A549 & K562 DDA dataset; (B) HCC1806 & HS578T DDA dataset; (C) A549 & K562 DIA dataset; (D) HCC1806 & HS578T DIA dataset measured by Spearman correlation coefficients.



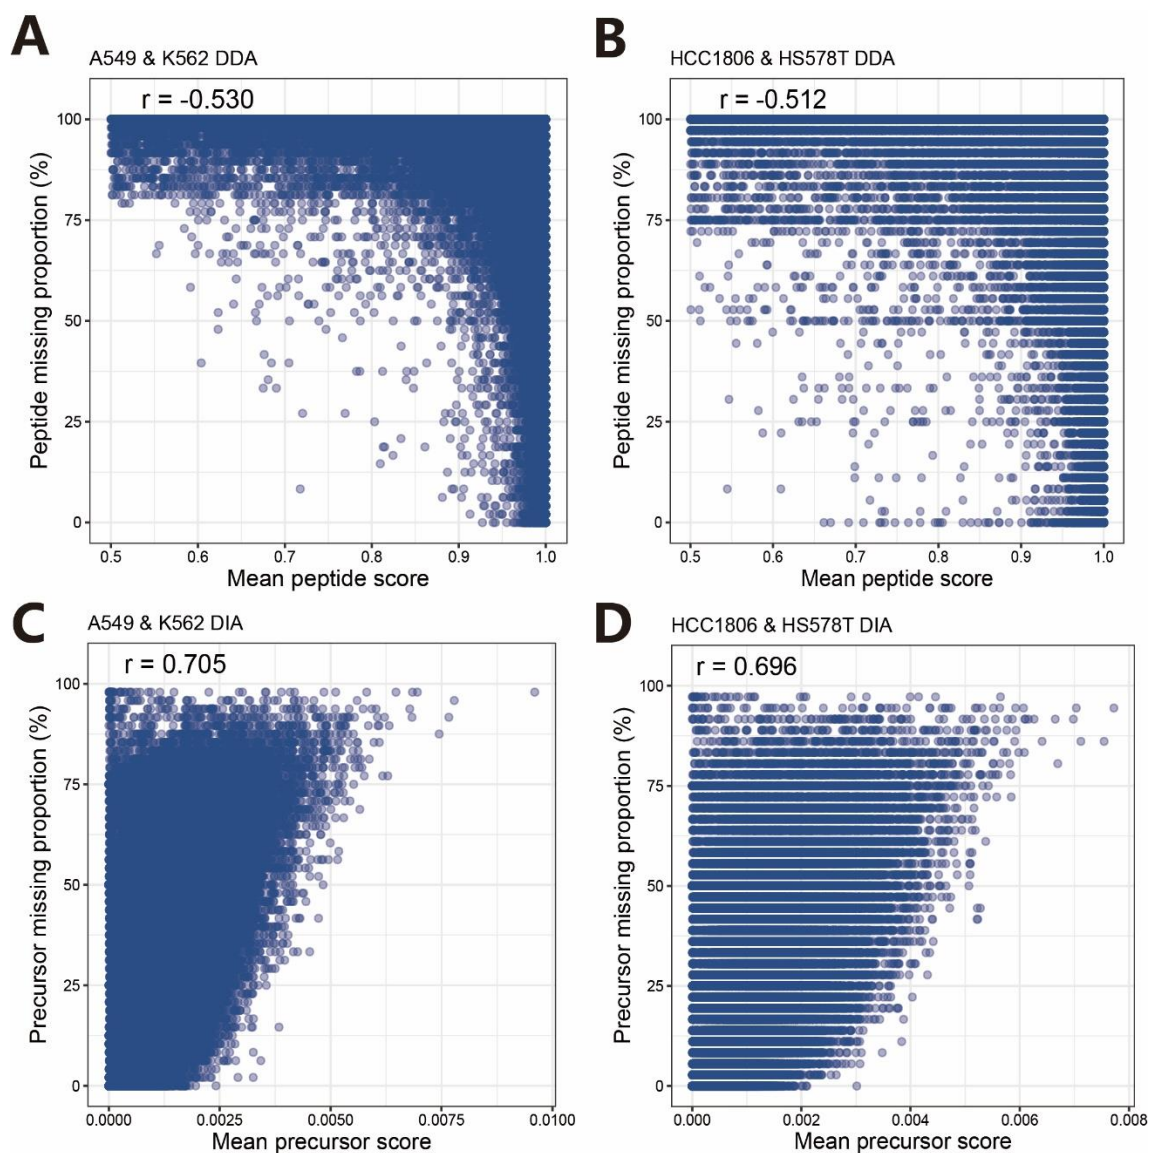

Supplementary Fig. 6: Relationship between missing proportion and score of peptide (DDA) or precursor (DIA) from (A) A549 & K562 DDA dataset; (B) HCC1806 & HS578T DDA dataset; (C) A549 & K562 DIA dataset; (D) HCC1806 & HS578T DIA dataset measured by Spearman correlation coefficients.



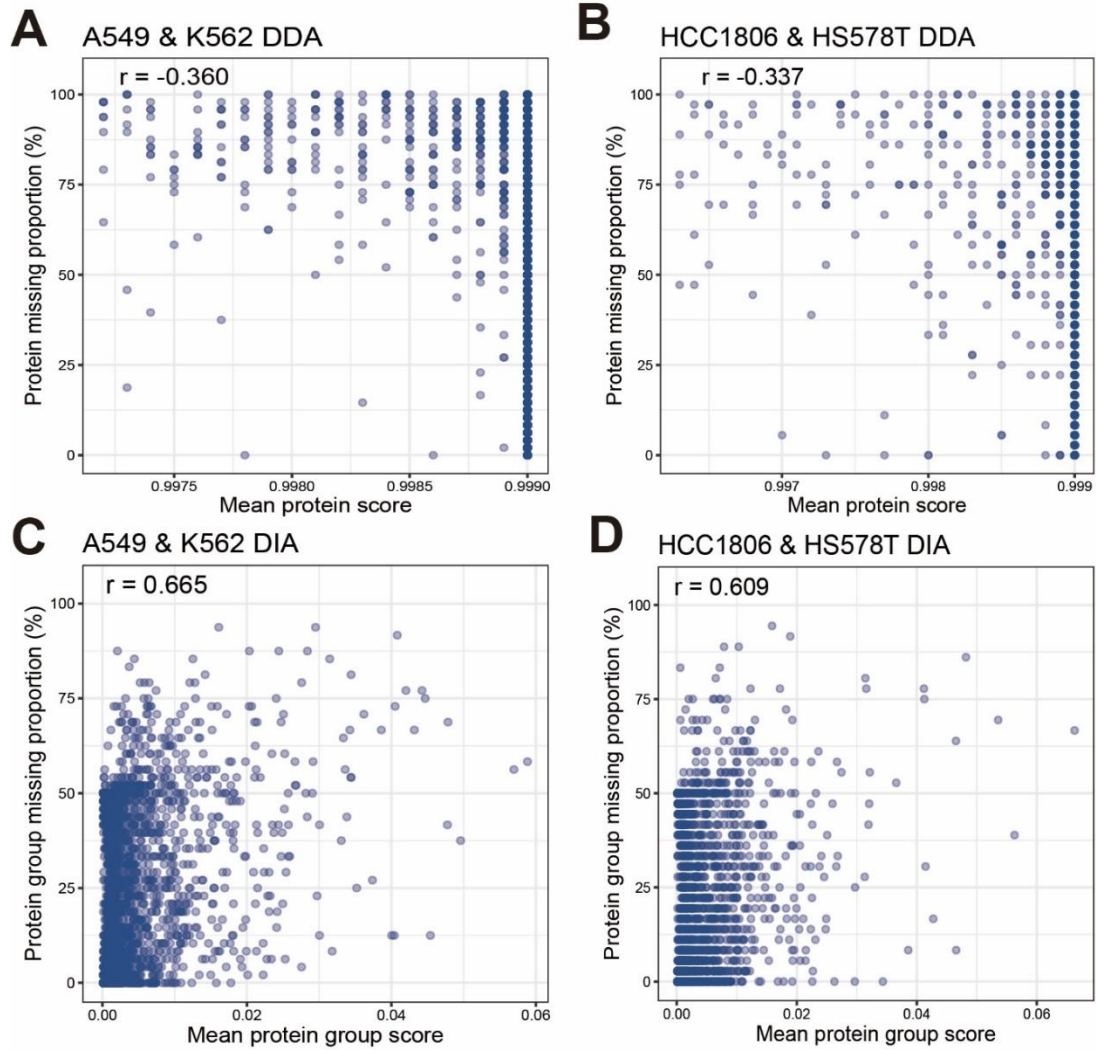

Supplementary Fig. 7: Relationship between missing proportion and score of protein (DDA) or protein group (DIA) from (A) A549 & K562 DDA dataset; (B) HCC1806 & HS578T DDA dataset; (C) A549 & K562 DIA dataset; (D) HCC1806 & HS578T DIA dataset measured by Spearman correlation coefficients.
